# Supplementary material
Source: PubMed Central journal article supplement (PMC8976159)
Supplement: NIHMS1763936-supplement-1.pdf [file NIHMS1763936-supplement-1.pdf]

**SUPPLEMENTAL APPENDIX**

Methods Supplement .....2

Supplemental Figure 1A. Relative strength of association of clinical, socioeconomic, and behavioral factors with CESD-10 score.....4

Supplemental Figure 1B. Predicted plots of the associations between non-linear continuous variables and CESD-10 from the multivariable-adjusted ordinal regression model including all variables shown in Supplemental Figure 1A.....5

Supplemental Table 1. Multivariable-adjusted odds ratios for the association with CESD-10 score.....6

Supplemental Table 2. Effect size of categorical variables included in the multivariable-adjusted Cox model for incident heart failure shown in Table 2, Model 3.....7

Supplemental Figure 2. Predicted plots for non-linear continuous variables included in the multivariable-adjusted Cox model for incident heart failure shown in Table 2, Model 3.....8

Supplemental Table 3. Baseline Characteristics by Incident Heart Failure Status.....9

Supplemental Table 4. Clinical Trials testing treatment of depression in patients with prevalent heart failure.....10

References of Supplemental Appendix .....12

## **Methods Supplement**

### ***Study Population***

CHC participants completed standardized computer-assisted personal interviews while the remainder were recruited via mail-based general population sampling. Baseline data collected at enrollment included demographic (including self-reported race), socioeconomic, lifestyle, physical activity, and medical history.

### ***Depressive symptoms and medications***

CESD-10 assesses each symptom on a 4-point scale (ranging from 0 to 3 for ‘rarely or none of the time,’ ‘some or a little of the time,’ ‘occasionally or a moderate amount of the time,’ and ‘all of the time’), yielding a total score from 0 to 30.

### ***Cardiovascular and Behavioral Risk Factors***

At enrollment, demographic factors, including self-reported race were recorded. Medical conditions, including the traditional cardiovascular risk factors HTN, hyperlipidemia (HLD), DM, as well as history of stroke or transient ischemic attack (TIA) were ascertained via participant self-report of a physician diagnosis of the condition. In the majority (90%), BMI was calculated from self-reported height and weight; a previously validated method against objective measures.(1) Smoking and alcohol intake were self-reported. Prior studies in the SCCS have demonstrated accuracy and validity for self-reported measures.(2) Physical activity was assessed via questionnaire validated for use in the SCCS.(3)

### ***Social Determinants of Health***

Participants reported highest attained education, household income over the last year, employment status, and marital status. Similar to the Multidimensional Scale of Perceived Social Support, other social support questions included (1) How many close friends or relatives would



help you with your emotional problems or feelings if you need it? and (2) How many people could you ask for help in an emergency or with lending you money? (4)

Journal Pre-proof

**Supplemental Figure 1A.** Relative strength of association of clinical, socioeconomic, and behavioral factors with CESD-10 score.

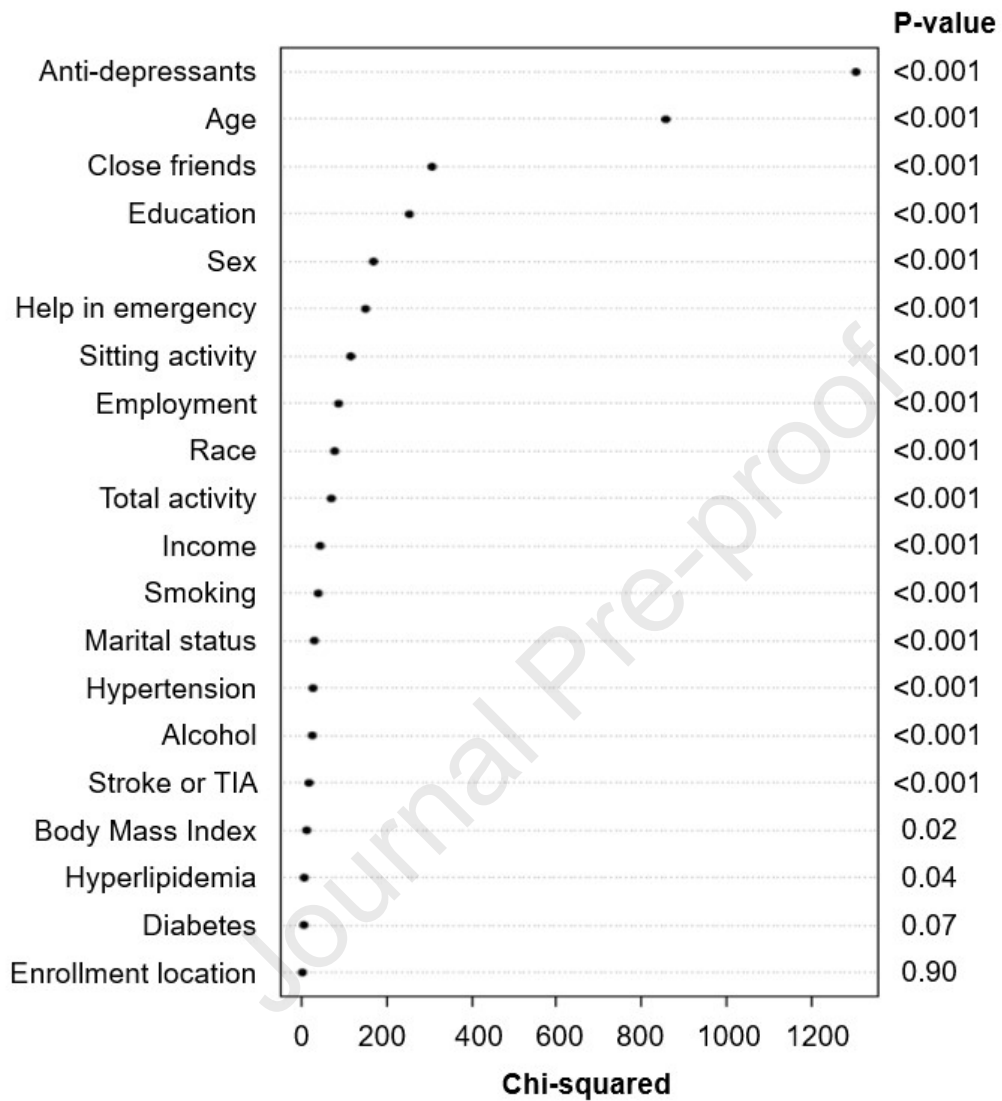

**Caption:** Socioeconomic factors and anti-depressant/anxiolytic medication are most strongly associated with CESD-10 score. Results from multivariable ordinal logistic regression model adjusted for all variables shown. TIA= transient ischemic attack.

**Supplemental Figure 1B.** Predicted plots of the associations between non-linear continuous variables and CESD-10 from the multivariable-adjusted ordinal regression model including all variables shown in Supplemental Figure 1A.

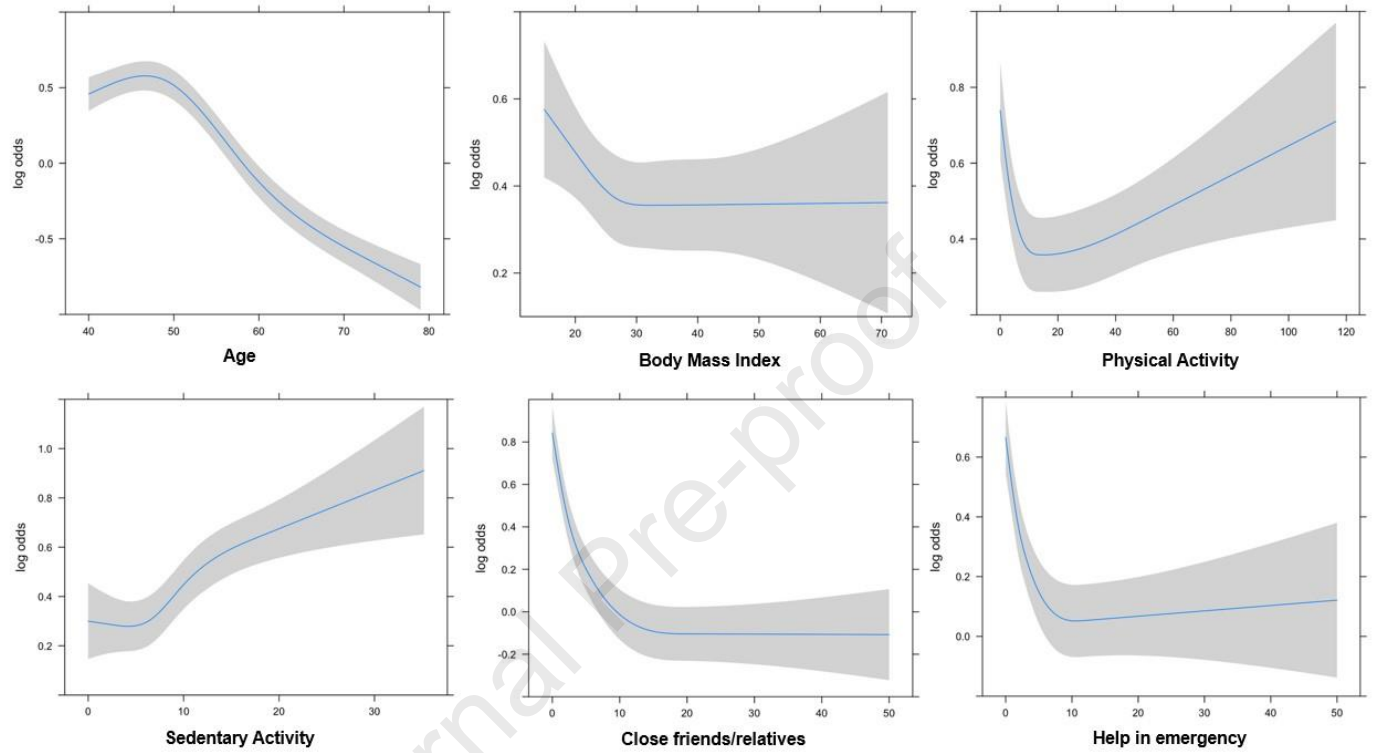

**Caption:** The association of these variables with CESD-10 score are non-linear. For example, individuals <60 years of age are more likely to have higher CESD10 scores whereas those over 60 years of age are less likely to have higher CESD10 scores.

**Supplemental Table 1. Multivariable-adjusted odds ratios for the association with CESD-10 score.**

| <b>Factor</b>               | <b>OR</b> | <b>95% CI</b> | <b>P-value</b> |
|-----------------------------|-----------|---------------|----------------|
| Sex                         | 0.70      | (0.66, 0.74)  | <0.001         |
| Race                        | 0.78      | (0.74, 0.82)  | <0.001         |
| Hypertension                | 1.14      | (1.08, 1.20)  | <0.001         |
| Diabetes                    | 1.06      | (1.00, 1.12)  | 0.07           |
| Hyperlipidemia              | 1.06      | (1.00, 1.11)  | 0.04           |
| Cerebrovascular disease     | 1.19      | (1.09, 1.29)  | <0.001         |
| Smoking <sup>a</sup>        | 0.87      | (0.82, 0.92)  | <0.001         |
| Education                   | 0.77      | (0.74, 0.79)  | <0.001         |
| Income                      | 0.89      | (0.86, 0.92)  | <0.001         |
| Employment                  | 0.73      | (0.68, 0.78)  | <0.001         |
| Alcohol                     | 1.01      | (1.00, 1.01)  | <0.001         |
| Marital status <sup>b</sup> | 0.85      | (0.80, 0.90)  | <0.001         |
| Anti-depressant use         | 2.89      | (2.73, 3.06)  | <0.001         |

<sup>a</sup>Smoking: current vs. never; <sup>b</sup>Marital: married vs. divorced/separated

**Supplemental Table 2. Effect size of categorical variables included in the multivariable-adjusted Cox model for incident heart failure shown in Table 2, Model 3**

| <b>Factor</b>               | <b>HR</b> | <b>95% CI</b> | <b>P-value</b> |
|-----------------------------|-----------|---------------|----------------|
| Sex                         | 1.13      | (1.06, 1.20)  | <0.001         |
| Race                        | 0.90      | (0.85, 0.96)  | 0.001          |
| Hypertension                | 1.55      | (1.45, 1.66)  | <0.001         |
| Diabetes                    | 1.61      | (1.52,1.71)   | <0.001         |
| Hyperlipidemia              | 0.96      | (0.91, 1.01)  | 0.20           |
| Cerebrovascular disease     | 1.34      | (1.23, 1.46)  | <0.001         |
| Smoking <sup>a</sup>        | 0.74      | (0.69, 0.79)  | <0.001         |
| Education                   | 0.94      | (0.90, 0.98)  | 0.002          |
| Income                      | 0.89      | (0.85, 0.93)  | <0.001         |
| Employment                  | 0.82      | (0.75, 0.90)  | <0.001         |
| Alcohol                     | 1.00      | (1.00, 1.00)  | 0.69           |
| Marital status <sup>b</sup> | 1.00      | (0.93, 1.07)  | 0.29           |
| Anti-depressant use         | 1.05      | (0.98, 1.12)  | 0.24           |

<sup>a</sup>Smoking: current vs. never; <sup>b</sup>Marital: married vs. divorced/separated

**Supplemental Figure 2.** Predicted plots for non-linear continuous variables included in the multivariable-adjusted Cox model for incident heart failure shown in Table 2, Model 3

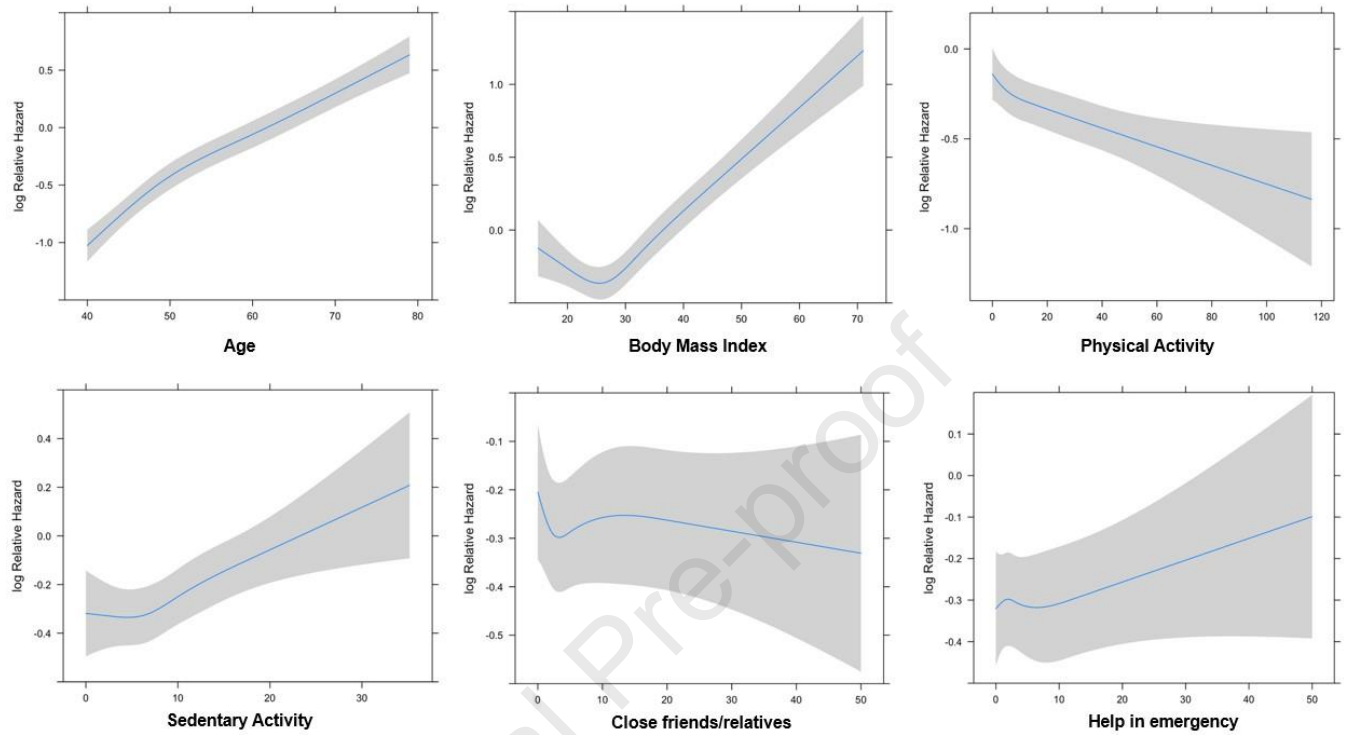

**Caption:** Represented as log of relative hazard, thus the more positive the value the higher the risk of incident heart failure. For example, older age, higher body mass index, and less physical activity are associated with increased risk of HF.



**Supplemental Table 3. Baseline Characteristics by Incident Heart Failure Status**

| <b>Characteristic</b>           | <b>No HF<br/>(N=17856)</b> | <b>HF<br/>(N=6081)</b> | <b><i>p</i></b> |
|---------------------------------|----------------------------|------------------------|-----------------|
| Age, years                      | 52 (45, 63)                | 58 (50, 66)            | <0.001          |
| Female, %                       | 63                         | 66                     | <0.001          |
| Black, %                        | 70                         | 70                     | 0.88            |
| Education, %                    |                            |                        | <0.001          |
| <High school                    | 36                         | 44                     |                 |
| HS/vocational/junior college    | 55                         | 49                     |                 |
| ≥ College degree                | 9                          | 7                      |                 |
| Annual income < \$15,000, %     | 69                         | 74                     | <0.001          |
| Employed, %                     | 17                         | 11                     | <0.001          |
| Comorbidities, %                |                            |                        |                 |
| Hypertension                    | 60                         | 75                     | <0.001          |
| Diabetes                        | 21                         | 38                     | <0.001          |
| Hyperlipidemia                  | 35                         | 43                     | <0.001          |
| Cerebrovascular disease         | 7                          | 12                     | <0.001          |
| BMI                             | 28.4 (24.4, 33.7)          | 31.0 (26.1, 37.1)      | <0.001          |
| Smoking, %                      |                            |                        | <0.001          |
| Current                         | 42                         | 37                     |                 |
| Former                          | 22                         | 28                     |                 |
| Never                           | 36                         | 35                     |                 |
| Physical activity               |                            |                        |                 |
| Sitting, hrs/day                | 8.0 (5.5,11.5)             | 8.0 (5.5,11.7)         | 0.07            |
| Total activity, met-hrs/day     | 13.7 (6.9, 24.6)           | 11.7 (6.1, 20.4)       | <0.001          |
| Alcohol per day <sup>a</sup>    | 1.2 ± 3.9                  | 0.9 ± 3.3              | <0.001          |
| Marital Status, %               |                            |                        | <0.001          |
| Married                         | 29                         | 29                     |                 |
| Divorced or separated           | 34                         | 34                     |                 |
| Widowed                         | 12                         | 19                     |                 |
| Never married                   | 25                         | 18                     |                 |
| Close friends/relatives, n      | 3 (2, 6)                   | 3 (2, 6)               | 0.30            |
| Help in emergency, n            | 2 (1, 5)                   | 2 (1, 5)               | 0.54            |
| Anti-depressants/anxiolytics, % | 27                         | 28                     | 0.14            |
| History of Depression, %        | 32                         | 32                     | 0.52            |
| CESD-10 Score                   | 9 (5, 13)                  | 9 (5, 13)              | 0.90            |

<sup>a</sup>All continuous variables are displayed as median (25<sup>th</sup>, 75<sup>th</sup> percentile) except where indicated by (<sup>a</sup>) for which mean ± SD is displayed. BMI = body mass index, hrs= hours, HS= high school

**Supplemental Table 4. Clinical Trials testing treatment of depression in patients with prevalent heart failure**

| <b>Acronym/<br/>Clinical Trial/<br/>Author, Year</b> | <b>Key inclusion<br/>criteria</b>                    | <b>Design</b>                                                     | <b>Intervention</b>               | <b>Primary Endpoint</b>                                                       | <b>Results</b>                                                             |
|------------------------------------------------------|------------------------------------------------------|-------------------------------------------------------------------|-----------------------------------|-------------------------------------------------------------------------------|----------------------------------------------------------------------------|
| Gottlieb, 2007(5)                                    | HFrEF (EF ≤ 40%)<br>NYHA II-III<br>BDI score ≥ 10    | Multicenter<br>Double-blind<br>Randomized<br>Placebo-controlled   | Paroxetine<br>12 weeks            | Depression symptoms and<br>QOL                                                | Reduction in depression and<br>improvement in<br>psychological QOL factors |
| Fraguas, 2009(6)                                     | HF (EF <50)<br>Clinical MDD                          | Single center<br>Double-blind<br>Randomized<br>Placebo-controlled | Citalopram<br>8 weeks             | Change in Ham-D                                                               | Terminated early due to high<br>placebo response rate                      |
| SADHART-CHF<br>NCT00078286<br>O'Connor, 2010(7)      | HFrEF (EF ≤ 45%)<br>NYHA II-VI<br>Clinical MDD       | Multicenter<br>Double-blind<br>Randomized<br>Placebo-controlled   | Sertraline<br>12 weeks            | Depression severity<br>Cardiovascular status                                  | No reduction in depression or<br>improvement in CV status                  |
| MOOD-HF<br>ISRCTN33128015<br>Angermann,<br>2016(8)   | HFrEF (EF ≤ 45%)<br>NYHA II-VI<br>Clinical MDD       | Multicenter<br>Double-blind<br>Randomized<br>Placebo-controlled   | Escitalopram<br>24 months         | Time to all-cause death or<br>hospitalization                                 | No difference                                                              |
| OCEAN<br>NCT02057406<br>Jiang, 2018(9)               | HF, NYHA > II<br>Clinical MDD<br>HAM-D ≥ 18          | Multicenter<br>Double-blind<br>Randomized<br>Placebo-controlled   | Long-Chain<br>Omega-3<br>12 weeks | Depressive symptoms<br>Red blood cell levels of EPA                           | No difference in depression<br>Increased red blood cell<br>levels          |
| HF- ACTION<br>NCT00047437<br>Blumenthal,<br>2012(10) | HFrEF (EF ≤ 35%)<br>NYHA II-III<br>BDI-II completion | Multicenter<br>Randomized<br>Controlled                           | Exercise program<br>12 months     | Composite of all-cause death<br>or hospitalization<br>Change in BDI-II scores | Reduction in depressive<br>symptoms                                        |

|                                    |                                                     |                                             |                                            |                                                                       |                                                                            |
|------------------------------------|-----------------------------------------------------|---------------------------------------------|--------------------------------------------|-----------------------------------------------------------------------|----------------------------------------------------------------------------|
| Abdelbasset, 2019(11)              | HFrEF (EF < 40%)<br>NYHA II-III<br>PHQ-9 score 5-19 | Single center<br>Single blind<br>Randomized | Exercise program<br>12 weeks               | Depression status                                                     | Reduction in depression levels                                             |
| Gary, 2010(12)                     | HF(EF ≥ 15%)<br>NYHA II-III<br>BDI- II score ≥ 10   | Single center<br>Randomized<br>Single-Blind | Exercise + CBT<br>12 weeks                 | Depressive symptoms,<br>physical function, and health-<br>related QOL | Improvement in physical<br>function only                                   |
| Dekker, 2012(13)                   | HF hospitalization<br>NYHA III-IV<br>BDI-II 10-28   | Multicenter<br>Randomized                   | CBT<br>2 episodes                          | Depressive symptoms                                                   | No difference                                                              |
| NCT01028625<br>Freedland, 2015(14) | HF diagnosis<br>NYHA I-III<br>BDI-II ≥ 14           | Single center<br>Randomized<br>Single-blind | CBT<br>6 months                            | BDI-II score<br>Self-care score                                       | Reduction in depression<br>scores but no difference in<br>self-care scores |
| NCT01681771<br>Lundgren, 2016(15)  | HF diagnosis<br>PHQ-9 ≥ 5                           | Multicenter<br>Randomized                   | Internet-based CBT<br>9 weeks              | Depressive symptoms                                                   | No difference                                                              |
| NCT02044211<br>Rollman, 2021(16)   | HFrEF (EF < 45%)<br>NYHA II-IV<br>PHQ-9 ≥ 10        | Multicenter<br>Single-blind<br>Randomized   | Blended<br>Collaborative care<br>12 months | Mental Health QOL                                                     | Improvement in QOL<br>compared to usual care                               |

BDI = Beck depression index, CBT = cognitive behavior therapy, CV= cardiovascular, EF = ejection fraction, EPA = eicosapentaenoic acid, Ham-D = Hamilton Rating Scale- Depression, HF = heart failure, HFrEF = heart failure reduced ejection fraction, NYHA = New York Heart Association, MDD = major depressive disorder, PHQ-9 = Patient Health Questionnaire 9, QOL = quality of life

## References of Supplemental Appendix

1. Cohen SS, Signorello LB, Cope EL et al. Obesity and all-cause mortality among black adults and white adults. *Am J Epidemiol* 2012;176:431-42.
2. Signorello LB, Hargreaves MK, Blot WJ. The Southern Community Cohort Study: investigating health disparities. *J Health Care Poor Underserved* 2010;21:26-37.
3. Buchowski MS, Matthews CE, Cohen SS et al. Evaluation of a questionnaire to assess sedentary and active behaviors in the Southern Community Cohort Study. *Journal of physical activity & health* 2012;9:765-75.
4. Zimet GD, Powell SS, Farley GK, Werkman S, Berkoff KA. Psychometric characteristics of the Multidimensional Scale of Perceived Social Support. *J Pers Assess* 1990;55:610-7.
5. Gottlieb SS, Kop WJ, Thomas SA et al. A double-blind placebo-controlled pilot study of controlled-release paroxetine on depression and quality of life in chronic heart failure. *Am Heart J* 2007;153:868-873.
6. Fraguas R, da Silva Telles RM, Alves TC et al. A double-blind, placebo-controlled treatment trial of citalopram for major depressive disorder in older patients with heart failure: the relevance of the placebo effect and psychological symptoms. *Contemp Clin Trials* 2009;30:205-11.
7. O'Connor CM, Jiang W, Kuchibhatla M et al. Safety and efficacy of sertraline for depression in patients with heart failure: results of the SADHART-CHF (Sertraline Against Depression and Heart Disease in Chronic Heart Failure) trial. *J Am Coll Cardiol* 2010;56:692-9.
8. Angermann CE, Gelbrich G, Stork S et al. Effect of Escitalopram on All-Cause Mortality and Hospitalization in Patients With Heart Failure and Depression: The MOOD-HF Randomized Clinical Trial. *JAMA* 2016;315:2683-93.
9. Jiang W, Whellan DJ, Adams KF et al. Long-Chain Omega-3 Fatty Acid Supplements in Depressed Heart Failure Patients: Results of the OCEAN Trial. *JACC Heart failure* 2018;6:833-843.

10. Blumenthal JA, Babyak MA, O'Connor C et al. Effects of exercise training on depressive symptoms in patients with chronic heart failure: the HF-ACTION randomized trial. *JAMA* 2012;308:465-74.
11. Abdelbasset WK, Alqahtani BA. A randomized controlled trial on the impact of moderate-intensity continuous aerobic exercise on the depression status of middle-aged patients with congestive heart failure. *Medicine (Baltimore)* 2019;98:e15344.
12. Gary RA, Dunbar SB, Higgins MK, Musselman DL, Smith AL. Combined exercise and cognitive behavioral therapy improves outcomes in patients with heart failure. *J Psychosom Res* 2010;69:119-31.
13. Dekker RL, Moser DK, Peden AR, Lennie TA. Cognitive Therapy Improves Three-Month Outcomes in Hospitalized Patients With Heart Failure. *J Card Fail* 2012;18:10-20.
14. Freedland KE, Carney RM, Rich MW, Steinmeyer BC, Rubin EH. Cognitive Behavior Therapy for Depression and Self-Care in Heart Failure Patients: A Randomized Clinical Trial. *JAMA internal medicine* 2015;175:1773-1782.
15. Lundgren JG, Dahlström Ö, Andersson G, Jaarsma T, Kärner Köhler A, Johansson P. The Effect of Guided Web-Based Cognitive Behavioral Therapy on Patients With Depressive Symptoms and Heart Failure: A Pilot Randomized Controlled Trial. *J Med Internet Res* 2016;18:e194.
16. Rollman BL, Anderson AM, Rothenberger SD et al. Efficacy of Blended Collaborative Care for Patients With Heart Failure and Comorbid Depression: A Randomized Clinical Trial. *JAMA internal medicine* 2021.
